# Supplementary material for: The sympathetic nervous system is controlled by transient receptor potential vanilloid 1 in the regulation of body temperature
Source: PubMed Central journal article supplement (PMC4650996; doi:10.1096/fj.15-272526), 2015-07-01
Supplement: supp_fj.15-272526_Supplemental_Figure1.pdf [file supp_fj.15-272526_Supplemental_Figure1.pdf]

### Supplemental Figure 1.

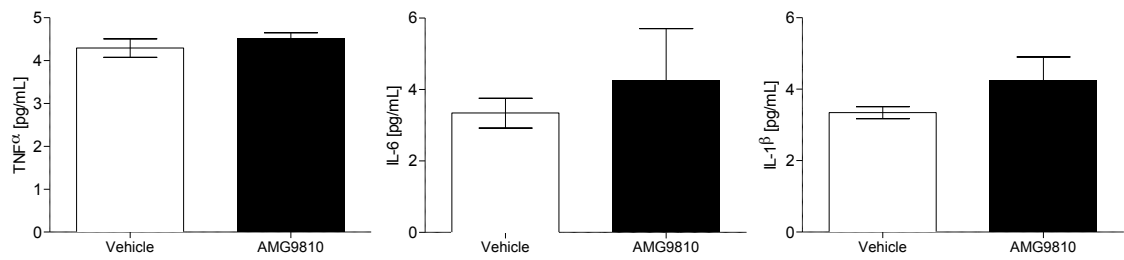

### Supplemental Figure 1.

Plasma cytokine concentrations are unchanged by AMG9810-mediated hyperthermia. TNF $\alpha$ , IL6, IL1 $\beta$  concentrations were investigated in plasma from AMG9810 or vehicle-treated WT mice. Results are mean + s.e.m. n=5-6.
