# Supplementary material for: The sympathetic nervous system is controlled by transient receptor potential vanilloid 1 in the regulation of body temperature
Source: PubMed Central journal article supplement (PMC4650996; doi:10.1096/fj.15-272526), 2015-07-01
Supplement: supp_fj.15-272526_Supplemental_Figure2.pdf [file supp_fj.15-272526_Supplemental_Figure2.pdf]

## Supplemental Figure 2.

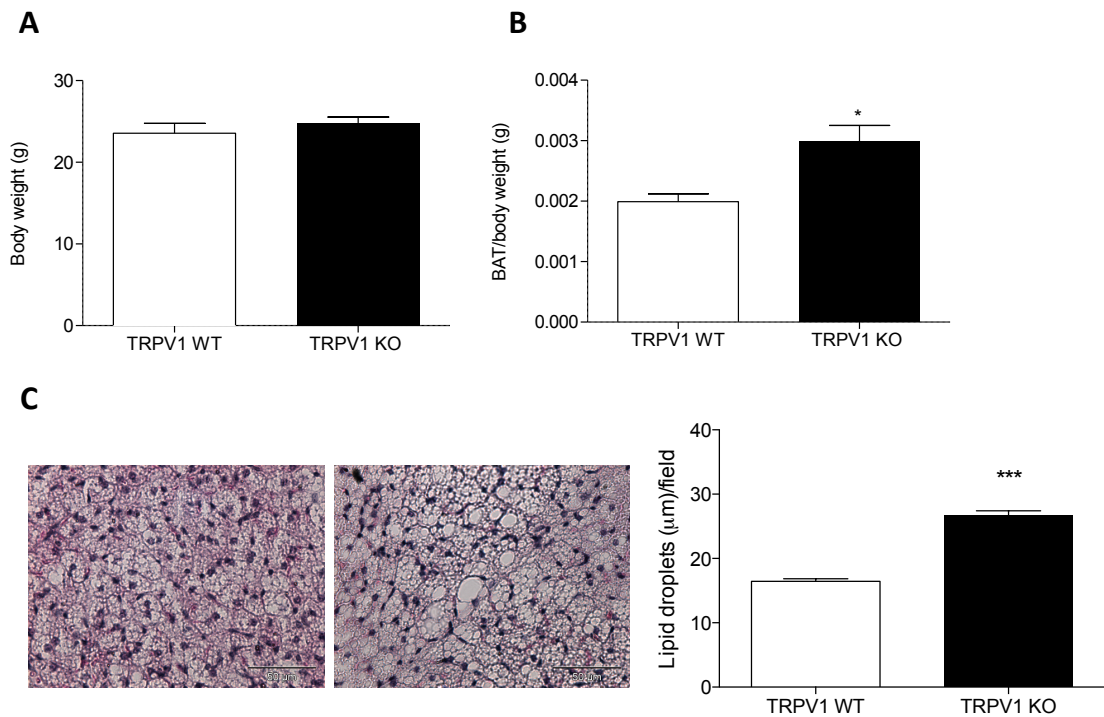

## Supplemental Figure 2

Increased lipisation in TRPV1 KO brown adipose tissue.

(A) Body mass of juvenile TRPV1 WT and KO mice (n=4-6). (B) Intrascapular BAT mass normalised to body weight is increased in TRPV1 KO mice (n=4-6). (C) H&E staining of BAT from naive TRPV1 WT (left) and KO (right) panel, acquired at x40 magnification; scale bar: 50  $\mu\text{m}$ . Quantification of lipid droplets diameter (n=4-6).

\*  $p < 0.05$ , \*\*  $p < 0.01$  vs WT using two-tailed Student's *t* test.
